# Supplementary material for: Molecular Basis for Autosomal-Dominant Renal Fanconi Syndrome Caused by HNF4A
Source: PubMed Central journal article supplement (PMC6941224; doi:10.1016/j.celrep.2019.11.066), 2019-12-24
Supplement: mmc1.pdf [file mmc1.pdf]

Cell Reports, Volume 29

## Supplemental Information

### Molecular Basis for Autosomal-Dominant

### Renal Fanconi Syndrome Caused by *HNF4A*

Valentina Marchesin, Albert Pérez-Martí, Gwenn Le Meur, Roman Pichler, Kelli Grand, Enriko D. Klootwijk, Anne Kesselheim, Robert Kleta, Soeren Lienkamp, and Matias Simons

**Table S1: Table summarizing the dominant negative effects (genomic and non-genomic) observed in all the different genotypes. Related to Figure 6.**

| PHENOTYPE<br>GENOTYPE               | Genomic effect        |                           |                               | Non-genomic effect |                             |                                          |                                              |
|-------------------------------------|-----------------------|---------------------------|-------------------------------|--------------------|-----------------------------|------------------------------------------|----------------------------------------------|
|                                     | Lipid droplets        | Mitochondria ATP5A levels | Nuclear localization          | Autophagy          | ER                          | Animal viability (with <i>Dot-GAL4</i> ) | Nephrocyte Viability (with <i>Sns-GAL4</i> ) |
| dHNF4 RNAi                          | High                  | Low                       | /                             | Normal             | Normal                      | Normal                                   | Normal (not shown)                           |
| dHNF4 <sup>lowOE</sup> (18°C)       | Very low              | Normal (data not shown)   | Normal                        | /                  | Normal                      | Normal                                   | Normal (not shown)                           |
| dHNF4 <sup>OE</sup> (25°C)          | Dual phenotype        | High (LD-) Normal (LD+)   | Normal (LD-) Peripheral (LD+) | High               | Normal (LD-) Expanded (LD+) | Normal (loss of NPs in adults)           | Reduced size and number                      |
| dHNF4 <sup>highOE</sup> (29°C)      | Very high             | Low                       | Very peripheral or absent     | High (not shown)   | Very expanded               | Early lethality                          | /                                            |
| dHNF4 <sup>S169A</sup> (25°C/29°C)  | Very low              | Very high                 | Normal                        | Normal             | Normal                      | Normal                                   | Normal (not shown)                           |
| dHNF4 <sup>R171W/MODY</sup> (25°C)  | Low                   | High                      | Normal                        | Normal             | Normal                      | Normal                                   | Normal                                       |
| dHNF4 <sup>R171W/MODY</sup> (29°C)  | Low                   | /                         | Normal                        | /                  | Normal                      | Normal                                   | /                                            |
| dHNF4 <sup>R167W/FRTS</sup> (25°C)  | Very high             | Low                       | Very peripheral or absent     | High               | Very expanded               | Early lethality                          | Loss of NPs                                  |
| dHNF4 <sup>R167W/FRTS</sup> (18°C)  | Very high             | Low (not shown)           | Very peripheral or absent     | /                  | Very expanded               | Early lethality                          | /                                            |
| dHNF4 <sup>R167W/S169A</sup> (25°C) | High (partial rescue) | Normal                    | Normal                        | Normal             | Normal                      | Normal                                   | Normal                                       |

/: data not available

**Table S2. *Drosophila* genotypes used in this study. Related to STAR Methods.**

| <b>Genotype</b>                                                                         | <b>Figure</b>                              |
|-----------------------------------------------------------------------------------------|--------------------------------------------|
| w; +/+; <i>hnf4</i> -HNF4-GFP.Flag                                                      | Figure 1                                   |
| w; +/+; <i>hsp70</i> -GAL4-dHNF4, UAS-nlacZ56                                           | Figure 1                                   |
| w; <i>Dot-Gal4</i> /+; UAS- <i>GFP-RNAi</i> (bloo#9330)/+                               | Figures 1, 2, 4, 6, S1, S2, S3, S4, S5, S6 |
| w; <i>Dot-Gal4</i> /UAS- <i>Pkd2-RNAi</i> (bloo#51502); +/+                             | Figure S1                                  |
| w/yv; <i>Dot-Gal4</i> /+; UAS- <i>HNF4-RNAi</i> (bloo#29375)/+                          | Figures 1, S1, S4                          |
| w; <i>Dot-Gal4</i> /UAS- <i>HNF4-RNAi</i> (Vienna GD12692); +/+                         | Figure S1                                  |
| w; <i>Dot-Gal4</i> /+; UAS-HNF4-3xHA/+ (FlyORF #F000144)                                | Figures 2, 3, S2, S3, S4                   |
| w; <i>Dot-Gal4</i> /UAS- <i>midway-RNAi</i> (bloo#65963); +/+                           | Figure S2                                  |
| w/yv; <i>Dot-Gal4</i> /+; UAS- <i>GFP-RNAi</i> /UAS- <i>HNF4-RNAi</i> (bloo#29375)      | Figure S2                                  |
| w/yv; <i>Dot-Gal4</i> /UAS- <i>midway-RNAi</i> ; UAS- <i>HNF4-RNAi</i> (bloo#29375)/+   | Figure S2                                  |
| w; <i>Dot-Gal4</i> /UAS- <i>midway-RNAi</i> ; UAS-HNF4-3xHA/+                           | Figure S2                                  |
| w; <i>Dot-Gal4</i> /+; UAS-HNF4 <sup>R167W</sup> -3xHA/+                                | Figures 5, 6, S6                           |
| w; <i>Dot-Gal4</i> /+; UAS-HNF4 <sup>R171W</sup> -3xHA/+                                | Figures 5, 6, S6                           |
| w; <i>Dot-Gal4</i> /+; UAS-HNF4 <sup>S169A</sup> -3xHA/+                                | Figures 4, S5                              |
| w; <i>Dot-Gal4</i> /+; UAS-HNF4 <sup>R167W/S169A</sup> -3xHA/+                          | Figures 5, 6                               |
| w; <i>Dot-Gal4</i> / UAS- <i>midway-RNAi</i> ; UAS-HNF4 <sup>R167W</sup> -3xHA/+        | Figure S6                                  |
| w; <i>Dot-Gal4</i> /UAS- <i>Pkd2-RNAi</i> ; <i>hnf4</i> -HNF4-GFP.Flag/+                | Figure 4                                   |
| w; <i>Dot-Gal4</i> /+; <i>hnf4</i> -HNF4-GFP.Flag/UAS-HNF4-3xHA                         | Figure 4                                   |
| w; <i>Dot-Gal4</i> /+; <i>hnf4</i> -HNF4-GFP.Flag/UAS-HNF4 <sup>R167W</sup> -3xHA       | Figure 5                                   |
| w; <i>Dot-Gal4</i> /+; <i>hnf4</i> -HNF4-GFP.Flag/UAS-HNF4 <sup>R171W</sup> -3xHA       | Figure 5                                   |
| w; <i>Dot-Gal4</i> /+; <i>hnf4</i> -HNF4-GFP.Flag/UAS-HNF4 <sup>S169A</sup> -3xHA       | Figure 4                                   |
| w; <i>Dot-Gal4</i> /+; <i>hnf4</i> -HNF4-GFP.Flag/UAS-HNF4 <sup>R167W/S169A</sup> -3xHA | Figure 5                                   |
| <i>Dot-Gal4</i> ; UAS-GFP-mCherry-Atg8/UAS- <i>Pkd2-RNAi</i> ; +/+                      | Figures S4, S5, S6                         |
| <i>Dot-Gal4</i> ; UAS-GFP-mCherry-Atg8/UAS- <i>ATP6AP2-RNAi</i> (Vienna KK105281); +/+  | Figure S4                                  |
| w; <i>Dot-Gal4</i> /UAS-GFP-mCherry-Atg8; UAS-HNF4-3XHA/+                               | Figure S4                                  |
| w; <i>Dot-Gal4</i> /UAS-GFP-mCherry-Atg8; UAS-HNF4 <sup>R167W</sup> -3XHA/+             | Figure S6                                  |

|                                                                                   |                   |
|-----------------------------------------------------------------------------------|-------------------|
| <i>Dot-Gal4</i> ; UAS-GFP-mCherry-Atg8/+; UAS-HNF4 <sup>R171W</sup> -3XHA/+       | Figure S6         |
| w; <i>Dot-Gal4</i> /UAS-GFP-mCherry-Atg8; UAS-HNF4 <sup>R167W/S169A</sup> -3XHA/+ | Figure S6         |
| <i>Dot-Gal4</i> ; UAS-GFP-mCherry-Atg8/+; UAS-HNF4 <sup>S169A</sup> -3XHA/+       | Figure S6         |
| w; <i>Sns-GAL4</i> /+; UAS- <i>GFP-RNAi</i> /+                                    | Figures 6, S1, S4 |
| w; <i>Sns-GAL4</i> /+; UAS- <i>HNF4-RNAi</i> (bloo#29375)/+                       | Figure S1         |
| w; <i>Sns-GAL4</i> /+; UAS-HNF4-3xHA/+                                            | Figure S4         |
| w; <i>Sns-GAL4</i> /+; UAS-HNF4 <sup>R167W</sup> -3xHA/+                          | Figure 6          |
| w; <i>Sns-GAL4</i> /+; UAS-HNF4 <sup>R171W</sup> -3xHA/+                          | Figure 6          |
| w; <i>Sns-GAL4</i> /+; UAS-HNF4 <sup>S169A/R167W</sup> -3xHA/+                    | Figure 6          |

**Table S3. Oligonucleotide information. Related to STAR Methods.**

| Samples                                               | Oligonucleotides                                                                                     |
|-------------------------------------------------------|------------------------------------------------------------------------------------------------------|
| Mutagenesis in flies: UAS-HNF4 <sup>R167W</sup>       | forward:CATTCTTCTGGAGGAGTGTTCAGGAAAA<br>TCATCAG<br>reverse:ACTCCTCCAGAAGAATCCTTTGCAGCCG<br>TCGCAGC   |
| Mutagenesis in flies: UAS-HNF4 <sup>S169A</sup>       | forward:CAGGAGGGCTGTCAGGAAAAATCATCAG<br>TACAC<br>reverse:CCTGACAGCCCTCCTGAAGAATCCTTTG<br>CAGC        |
| Mutagenesis in flies: UAS-HNF4 <sup>R167W/S169A</sup> | forward:CTGGAGGGCTGTCAGGAAAAATCATCAG<br>TACAC<br>reverse:CCTGACAGCCCTCCAGAAGAATCCTTTG<br>CAGC        |
| Mutagenesis in flies: UAS-HNF4 <sup>R171W</sup>       | forward:GGAGTGTCTGGAAAAATCATCAGTACAC<br>TTGCAG<br>reverse:GGAGTGTCTGGAAAAATCATCAGTACAC<br>TTGCAG     |
| Mutagenesis in COS-7 cells: R85W                      | forward:CGCACGCTCCTCCAGAAGAAGCCCTTG<br>reverse:CAAGGGCTTCTTCTGGAGGAGCGTGCG                           |
| Mutagenesis in COS-7 cells: R89W                      | forward:CATGTGTTCTTCCACACGCTCCTCCGG<br>A<br>reverse:TCCGGAGGAGCGTGTGGAAGAACCACAT<br>G                |
| Mutagenesis in COS-7 cells: S87A                      | forward:GGTTCTTCCGCACGGCCCTCCGGAAGAA<br>GC<br>reverse:GCTTCTTCCGGAGGGCCGTGCGGAAGA<br>ACC             |
| Mutagenesis in COS-7 cells: R85W/S87A                 | forward:GGTTCTTCCGCACGGCCCTCCAGAAGAA<br>GCCCTTGC<br>reverse:GCAAGGGCTTCTTCTGGAGGGCCGTGC<br>GGAAGAACC |
| Mutagenesis on human HNF4A: R85W                      | forward:GGGCTTCTTCTGGAGGAGCGT<br>reverse:GTCGACACTGCCGACGTT                                          |
| qPCR primers: Tbp                                     | forward:CCCCTTGACCTTACCAAT<br>reverse:GAAGCTGCGGTACAATTCCAG                                          |
| qPCR primers: HNF4A                                   | forward:GGTGTCCATACGCATCCTTGAC<br>reverse:AGCCGCTTGATCTTCCCTGGAT                                     |
| qPCR primers: V5.HNF4A                                | forward:GTAAGCCTATCCCTAACCCTCTC<br>reverse:AAATTCCAGGGTGGTGTAGG                                      |
